# Supplementary material for: Factors Affecting Antibiotic Prescription among Hospital Physicians in a Low-Antimicrobial-Resistance Country: A Qualitative Study
Source: MDPI journal article supplement (doi:10.3390/antibiotics11010098), 2022-01-13
Supplement: s1 [file s1]

Full interview guide

- 1) What are your thoughts about rational antibiotic prescription?**
- 2) What are your thoughts about antimicrobial resistance?**
- 3) How do you experience the antibiotic prescription in this hospital, from your perspective?**  
Probes:
  - Leads in your department? –is this something you think others experience or are the opinions dispersed?
- 4) What influences you when you prescribe antibiotics?**  
Probes:
  - Is it factors, persons etc. that influences you?
  - Can you think of an antibiotic prescription episode that you remember well?
- 5) Can you please tell me about a situation where you had to make a decision about to start, not start or stop antibiotics that you remember in particular?**  
Probe:
  - Why do you remember this episode?
  - What made you take the final decision?
  - Can you look back in your career, and recall an episode where you had to make a difficult decision regarding antibiotic prescription?
- 6) Do you have any last comments on rational antibiotic prescription?**
